# Supplementary material
Source: publisher site journal article supplement (https://www.dovepress.com/article/416892)
Supplement: Supplementary file 1 [file get_supplementary_file.php]

**Supplementary Table 1.** The numbers and percentages of children contributed to **Figure 2**.

| <b>Year</b> | <b>Population (n)</b> | <b>C-alone users (n)</b> | <b>W-alone users (n)</b> | <b>D-alone users (n)</b> | <b>C-alone users (%)</b> | <b>W-alone users (%)</b> | <b>D-alone users (%)</b> |
|-------------|-----------------------|--------------------------|--------------------------|--------------------------|--------------------------|--------------------------|--------------------------|
| <b>2002</b> | 235,703               | 46,268                   | 201,619                  | 89,296                   | 0.211                    | 0.920                    | 0.407                    |
| <b>2003</b> | 232,966               | 45,239                   | 187,399                  | 86,896                   | 0.222                    | 0.919                    | 0.426                    |
| <b>2004</b> | 225,954               | 44,245                   | 176,312                  | 88,976                   | 0.232                    | 0.926                    | 0.467                    |
| <b>2005</b> | 227,729               | 42,072                   | 165,124                  | 84,301                   | 0.237                    | 0.930                    | 0.475                    |
| <b>2006</b> | 225,796               | 38,500                   | 149,012                  | 78,043                   | 0.234                    | 0.907                    | 0.475                    |
| <b>2007</b> | 221,991               | 37,546                   | 135,776                  | 69,475                   | 0.249                    | 0.901                    | 0.461                    |
| <b>2008</b> | 218,649               | 35,186                   | 121,693                  | 60,527                   | 0.257                    | 0.888                    | 0.442                    |
| <b>2009</b> | 213,949               | 33,121                   | 112,564                  | 54,044                   | 0.268                    | 0.912                    | 0.438                    |
| <b>2010</b> | 209,091               | 28,300                   | 99,566                   | 47,843                   | 0.257                    | 0.905                    | 0.435                    |
| <b>2011</b> | 195,416               | 24,922                   | 88,748                   | 39,857                   | 0.259                    | 0.922                    | 0.414                    |
| <b>2012</b> | 181,432               | 21,998                   | 75,613                   | 33,730                   | 0.266                    | 0.913                    | 0.407                    |

Abbreviations: C, traditional Chinese physician; D, dentist; W, Western physician.

**Supplementary Table 2.** The numbers and percentages of children contributed to **Figure 3A** and **3B**.

| <b>Year</b> | <b>Population (n)</b> | <b>W+C<br/>users (n)</b> | <b>W+D<br/>users (n)</b> | <b>W+C+D<br/>users (n)</b> | <b>W+C<br/>users (%)</b> | <b>W+D<br/>users (%)</b> | <b>W+C+D<br/>users (%)</b> |
|-------------|-----------------------|--------------------------|--------------------------|----------------------------|--------------------------|--------------------------|----------------------------|
| <b>2002</b> | 219,196               | 19794                    | 25163                    | 162                        | 0.0903                   | 0.1148                   | 0.0007                     |
| <b>2003</b> | 204,020               | 19037                    | 24368                    | 175                        | 0.0933                   | 0.1194                   | 0.0009                     |
| <b>2004</b> | 190,357               | 18743                    | 27109                    | 271                        | 0.0985                   | 0.1424                   | 0.0014                     |
| <b>2005</b> | 177,525               | 18111                    | 25933                    | 230                        | 0.1020                   | 0.1461                   | 0.0013                     |
| <b>2006</b> | 164,266               | 15277                    | 21666                    | 229                        | 0.0930                   | 0.1319                   | 0.0014                     |
| <b>2007</b> | 150,637               | 14748                    | 18019                    | 217                        | 0.0979                   | 0.1196                   | 0.0014                     |
| <b>2008</b> | 136,972               | 13268                    | 14530                    | 183                        | 0.0969                   | 0.1061                   | 0.0013                     |
| <b>2009</b> | 123,379               | 12950                    | 12822                    | 136                        | 0.1050                   | 0.1039                   | 0.0011                     |
| <b>2010</b> | 110,032               | 10798                    | 10743                    | 89                         | 0.0981                   | 0.0976                   | 0.0008                     |
| <b>2011</b> | 96,267                | 10215                    | 8864                     | 61                         | 0.1061                   | 0.0921                   | 0.0006                     |
| <b>2012</b> | 82,837                | 8435                     | 7243                     | 76                         | 0.1018                   | 0.0874                   | 0.0009                     |

Abbreviations: C, traditional Chinese physician; D, dentist; W, Western physician.

**Supplementary Table 3.** The numbers and percentages of children contributed to **Supplementary Figure 1A** and **1B**.

| <b>Year</b> | <b>Numbers of prescriptions (n)</b> | <b>Numbers of coprescriptions of W+C (n)</b> | <b>Numbers of coprescriptions of W+D (n)</b> | <b>Numbers of coprescriptions of W+D (n)</b> | <b>Numbers of coprescriptions of W+C (%)</b> | <b>Numbers of coprescriptions of W+D (%)</b> | <b>Numbers of coprescriptions of W+D (%)</b> |
|-------------|-------------------------------------|----------------------------------------------|----------------------------------------------|----------------------------------------------|----------------------------------------------|----------------------------------------------|----------------------------------------------|
| <b>2002</b> | 2,869,005                           | 38,982                                       | 23,624                                       | 97                                           | 13.5873                                      | 8.2342                                       | 0.0338                                       |
| <b>2003</b> | 2,515,400                           | 37,886                                       | 23,299                                       | 122                                          | 15.0616                                      | 9.2625                                       | 0.0485                                       |
| <b>2004</b> | 2,393,953                           | 38,214                                       | 26,448                                       | 188                                          | 15.9627                                      | 11.0478                                      | 0.0785                                       |
| <b>2005</b> | 2,178,229                           | 36,929                                       | 25,144                                       | 151                                          | 16.9537                                      | 11.5433                                      | 0.0693                                       |
| <b>2006</b> | 1,733,107                           | 29,898                                       | 20,131                                       | 143                                          | 17.2511                                      | 11.6156                                      | 0.0825                                       |
| <b>2007</b> | 1,490,490                           | 27,680                                       | 16,059                                       | 158                                          | 18.5711                                      | 10.7743                                      | 0.1060                                       |
| <b>2008</b> | 1,248,653                           | 24,356                                       | 12,441                                       | 128                                          | 19.5058                                      | 9.9635                                       | 0.1025                                       |
| <b>2009</b> | 1,176,705                           | 24,377                                       | 10,724                                       | 103                                          | 20.7163                                      | 9.1136                                       | 0.0875                                       |
| <b>2010</b> | 994,013                             | 20,399                                       | 8,783                                        | 92                                           | 20.5219                                      | 8.8359                                       | 0.0926                                       |
| <b>2011</b> | 913,470                             | 19,497                                       | 7,107                                        | 61                                           | 21.3439                                      | 7.7802                                       | 0.0668                                       |
| <b>2012</b> | 728,759                             | 15,446                                       | 5,762                                        | 85                                           | 21.1949                                      | 7.9066                                       | 0.1166                                       |

Abbreviations: C, traditional Chinese physician; D, dentist; W, Western physician.

**Supplementary Table 4.** The numbers and percentages of children contributed to **Figure Supplementary 2A** and **2B**.

| <b>Year</b> | <b>Days of prescriptions (n)</b> | <b>Days of coprescriptions of W+C (n)</b> | <b>Days of coprescriptions of W+D (n)</b> | <b>Days of coprescriptions of W+D (n)</b> | <b>Days of coprescriptions of W+C (%)</b> | <b>Days of coprescriptions of W+D (%)</b> | <b>Days of coprescriptions of W+D (%)</b> |
|-------------|----------------------------------|-------------------------------------------|-------------------------------------------|-------------------------------------------|-------------------------------------------|-------------------------------------------|-------------------------------------------|
| <b>2002</b> | 47,225,909                       | 74,425                                    | 311,099                                   | 207                                       | 1.5759                                    | 6.5875                                    | 0.0044                                    |
| <b>2003</b> | 41,114,950                       | 83,028                                    | 335,820                                   | 1,792                                     | 2.0194                                    | 8.1678                                    | 0.0436                                    |
| <b>2004</b> | 38,638,238                       | 87,256                                    | 344,729                                   | 6,858                                     | 2.2583                                    | 8.9220                                    | 0.1775                                    |
| <b>2005</b> | 35,124,485                       | 91,912                                    | 377,692                                   | 2,324                                     | 2.6168                                    | 10.7530                                   | 0.0662                                    |
| <b>2006</b> | 27,401,849                       | 46,441                                    | 234,795                                   | 793                                       | 1.6948                                    | 8.5686                                    | 0.0289                                    |
| <b>2007</b> | 23,981,139                       | 42,614                                    | 200,485                                   | 4,232                                     | 1.7770                                    | 8.3601                                    | 0.1765                                    |
| <b>2008</b> | 21,076,328                       | 43,190                                    | 150,263                                   | 147                                       | 2.0492                                    | 7.1295                                    | 0.0070                                    |
| <b>2009</b> | 23,067,773                       | 3,747                                     | 8,668                                     | 0                                         | 0.1624                                    | 0.3758                                    | 0.0000                                    |
| <b>2010</b> | 24,122,489                       | 4,652                                     | 9,463                                     | 0                                         | 0.1928                                    | 0.3923                                    | 0.0000                                    |
| <b>2011</b> | 22,700,221                       | 4,258                                     | 8,194                                     | 0                                         | 0.1876                                    | 0.3610                                    | 0.0000                                    |
| <b>2012</b> | 18,523,781                       | 3,828                                     | 5,141                                     | 0                                         | 0.2067                                    | 0.2775                                    | 0.0000                                    |

Abbreviations: C, traditional Chinese physician; D, dentist; W, Western physician.

**Supplementary Table 5.** The numbers of children contributed to **Figure 4A** and **4B**.

| <b>Age</b> | <b>W+C<br/>users (n)</b> | <b>W+D<br/>users (n)</b> | <b>W+C+D<br/>users (n)</b> |
|------------|--------------------------|--------------------------|----------------------------|
| <1         | 0                        | 0                        | 0                          |
| 1          | 530                      | 107                      | 0                          |
| 2          | 1,066                    | 550                      | 4                          |
| 3-5        | 4,417                    | 7,274                    | 44                         |
| 6-8        | 4,023                    | 8,063                    | 58                         |
| 9-11       | 3,440                    | 4,132                    | 15                         |
| 12-14      | 3,059                    | 2,329                    | 23                         |
| 15-17      | 3,259                    | 2,708                    | 18                         |

Abbreviations: C, traditional Chinese physician; D, dentist; W, Western physician.

**Supplementary Table 6.** The numbers of children contributed to **Figure 5A, 5B,** and **5C.**

| <b>Age</b>   | <b>Numbers of coprescriptions</b> |            |              | <b>Numbers of children</b> |            |              | <b>Numbers of coprescriptions/<br/>numbers of children</b> |            |              |
|--------------|-----------------------------------|------------|--------------|----------------------------|------------|--------------|------------------------------------------------------------|------------|--------------|
|              | <b>W+C</b>                        | <b>W+D</b> | <b>W+C+D</b> | <b>W+C</b>                 | <b>W+D</b> | <b>W+C+D</b> | <b>W+C</b>                                                 | <b>W+D</b> | <b>W+C+D</b> |
| <b>&lt;1</b> | 0                                 | 0          | 0            | 0                          | 0          | 0            | 0.0                                                        | 0.0        | 0            |
| <b>1</b>     | 1,473                             | 145        | 0            | 530                        | 107        | 0            | 2.8                                                        | 1.4        | 0.0          |
| <b>2</b>     | 2,984                             | 774        | 4            | 1,066                      | 550        | 4            | 2.8                                                        | 1.4        | 1.0          |
| <b>3-5</b>   | 13,135                            | 12,106     | 45           | 4,417                      | 7,274      | 44           | 3.0                                                        | 1.7        | 1.0          |
| <b>6-8</b>   | 9,156                             | 11,645     | 59           | 4,023                      | 8,063      | 58           | 2.3                                                        | 1.4        | 1.0          |
| <b>9-11</b>  | 6,539                             | 5,235      | 15           | 3,440                      | 4,132      | 15           | 1.9                                                        | 1.3        | 1.0          |
| <b>12-14</b> | 5,282                             | 2,934      | 23           | 3,059                      | 2,329      | 23           | 1.7                                                        | 1.3        | 1.0          |
| <b>15-17</b> | 5,524                             | 3,505      | 18           | 3,259                      | 2,708      | 18           | 1.7                                                        | 1.3        | 1.0          |

Abbreviations: C, traditional Chinese physician; D, dentist; W, Western physician.

**Supplementary Table 7.** The numbers of children contributed to **Figure 6A, 6B, 6C** and **6D**.

| Age   | Numbers of days of coprescriptions |       |       | Numbers of children |       |       | Numbers of days of coprescriptions/<br>numbers of children |     |       |
|-------|------------------------------------|-------|-------|---------------------|-------|-------|------------------------------------------------------------|-----|-------|
|       | W+C                                | W+D   | W+C+D | W+C                 | W+D   | W+C+D | W+C                                                        | W+D | W+C+D |
| <1    | 0                                  | 0     | 0     | 0                   | 0     | 0     | 0.0                                                        | 0.0 | 0.0   |
| 1     | 1,937                              | 71    | 0     | 530                 | 107   | 0     | 3.7                                                        | 0.7 | 0.0   |
| 2     | 4,217                              | 277   | 6     | 1,066               | 550   | 4     | 6.5                                                        | 0.5 | 1.5   |
| 3-5   | 17,882                             | 4,130 | 119   | 4,417               | 7,274 | 44    | 6.2                                                        | 0.6 | 2.7   |
| 6-8   | 15,931                             | 4,694 | 142   | 4,023               | 8,063 | 58    | 5.2                                                        | 0.6 | 2.4   |
| 9-11  | 12,947                             | 2,935 | 23    | 3,440               | 4,132 | 15    | 4.4                                                        | 0.7 | 1.5   |
| 12-14 | 11,643                             | 1,916 | 68    | 3,059               | 2,329 | 23    | 3.6                                                        | 0.8 | 3.0   |
| 15-17 | 11,345                             | 2301  | 37    | 3259                | 2,708 | 18    | 2.7                                                        | 0.8 | 2.1   |

Abbreviations: C, traditional Chinese physician; D, dentist; W, Western physician.

Supplementary Figure 1A

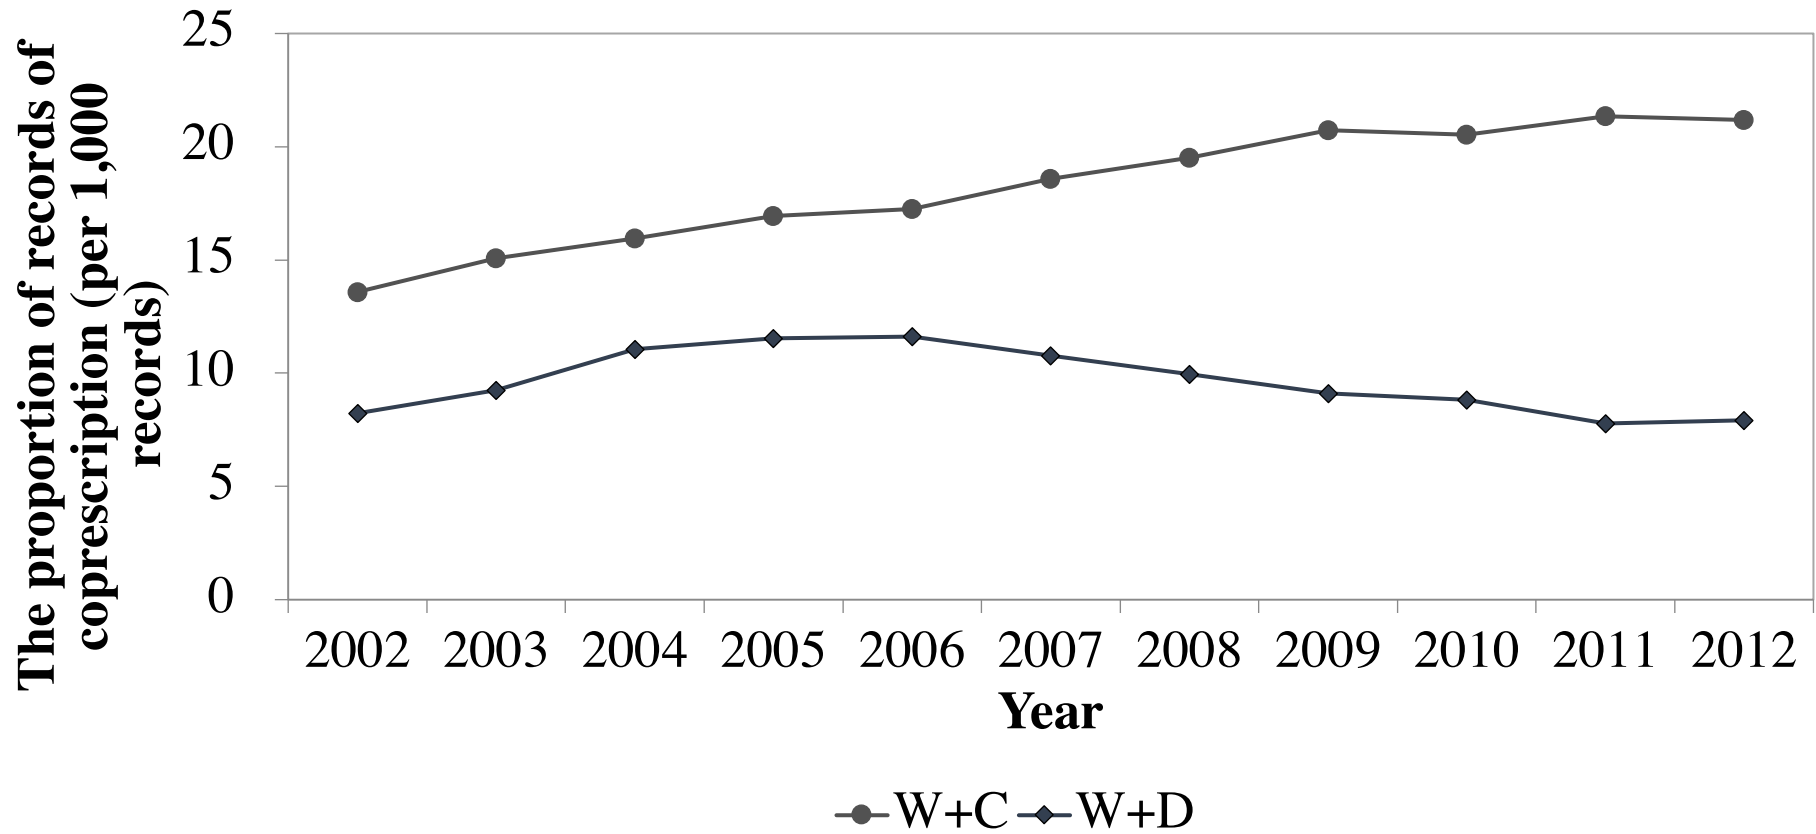

Supplementary Figure 1A The proportions of records of coprescriptions in children from W+C group indicated by green columns, and W+D group indicated by blue columns are stratified by year and corrected for the total number of coprescriptions in the insurance population yearly. Abbreviations: W, Western physician; C, traditional Chinese physician; D, dentist



Supplementary Figure 1B

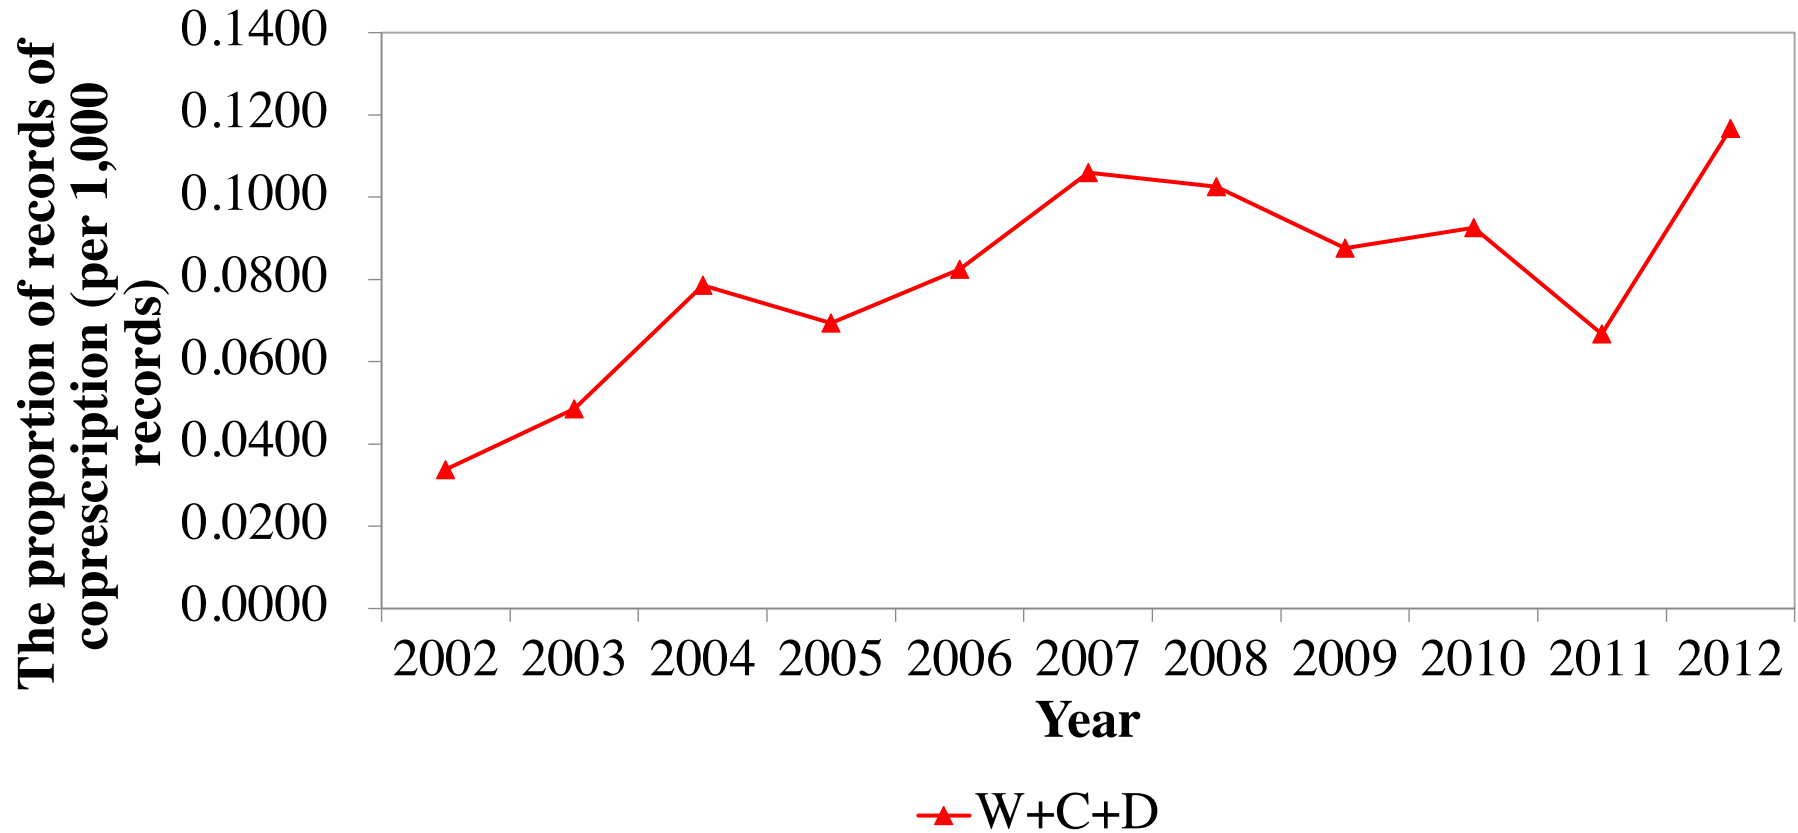

Supplementary Figure 1B The proportions of records of coprescriptions in children from W+C+D group indicated by red columns are stratified by year and corrected for the total number of coprescriptions in the insurance population yearly.

Abbreviations: W, Western physician; C, traditional Chinese physician; D, dentist

Supplementary Figure 2A

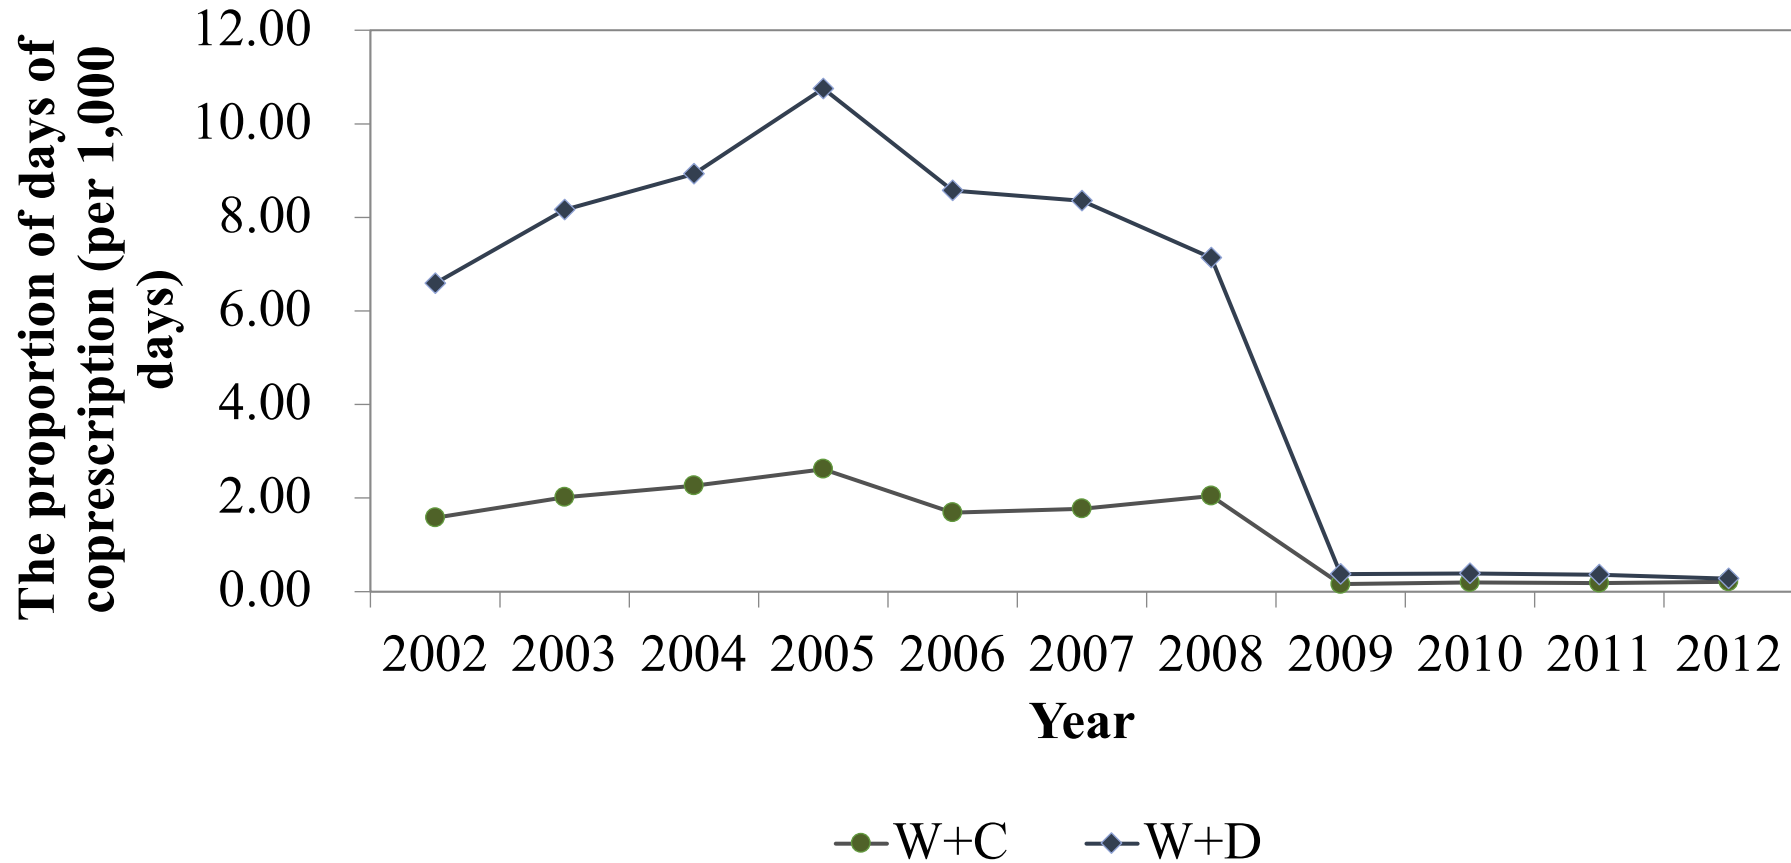

**Figure 2A** The Proportions of days of coprescriptions in children from W+C group indicated by green line, and W+D group indicated by blue line are stratified by year and corrected for the total days of prescriptions yearly.

**Abbreviations:** W, Western physician; C, traditional Chinese physician; D, dentist

Supplementary Figure 2B

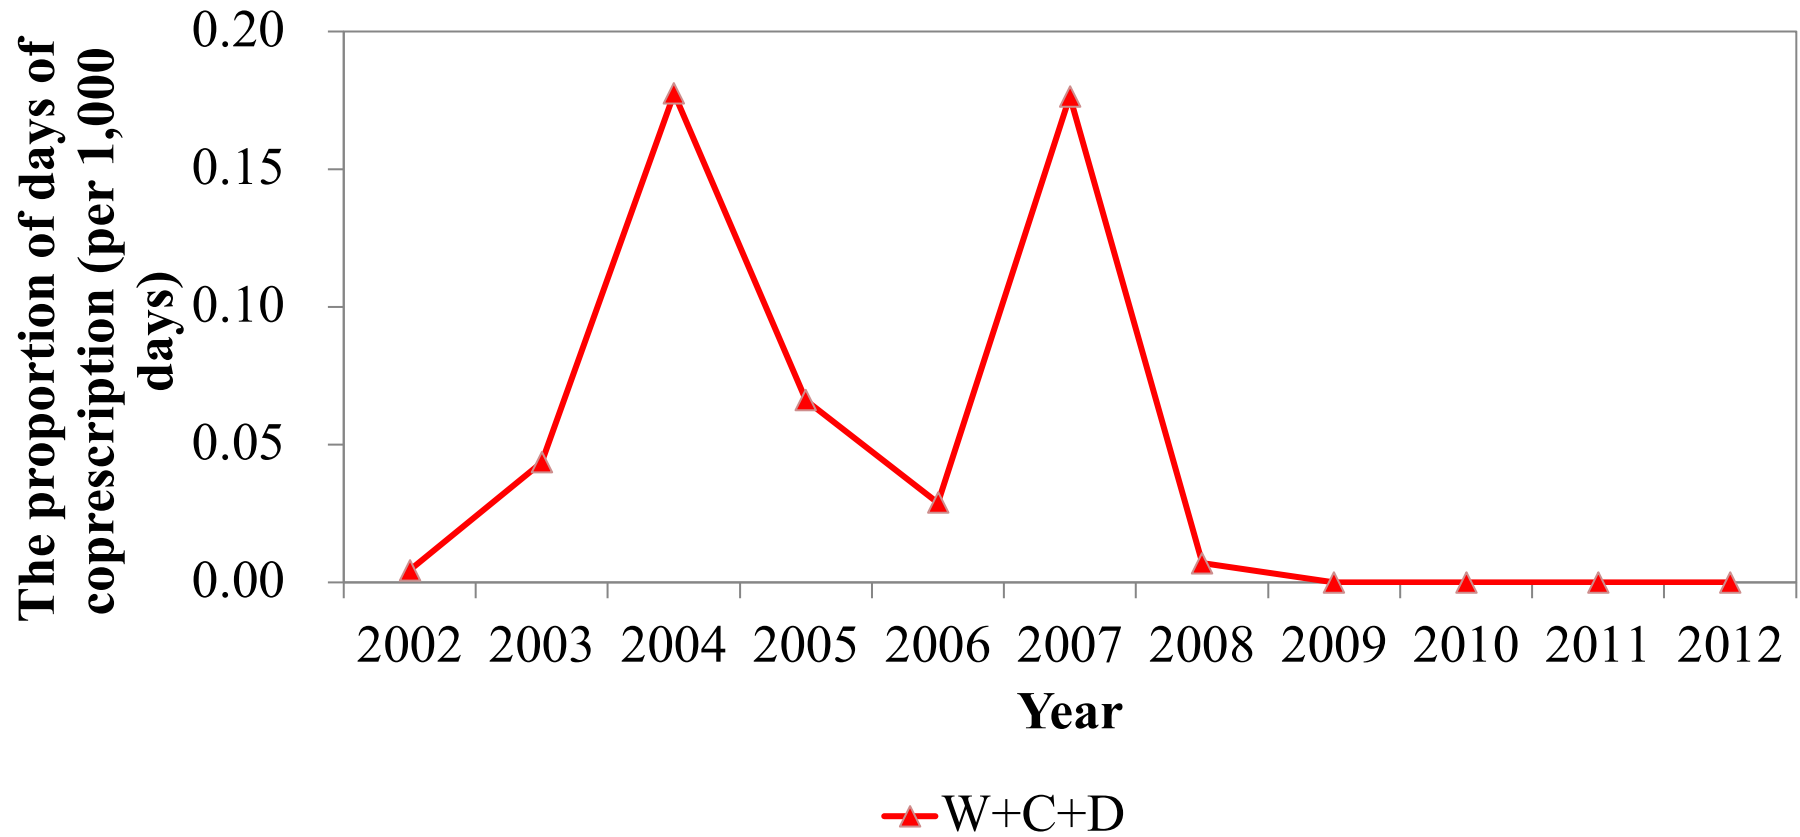

**Figure 2B** The Proportions of days of coprescriptions in children from W+C+D group indicated by a red line are stratified by year and corrected for the total days of prescriptions yearly.

**Abbreviations:** W, Western physician; C, traditional Chinese physician; D, dentist
